# Supplementary material for: Alteration of Metabolic Profiles during the Progression of Alzheimer’s Disease
Source: MDPI journal article supplement (doi:10.3390/brainsci13101459), 2023-10-13
Supplement: s1 [file s1]

## Female

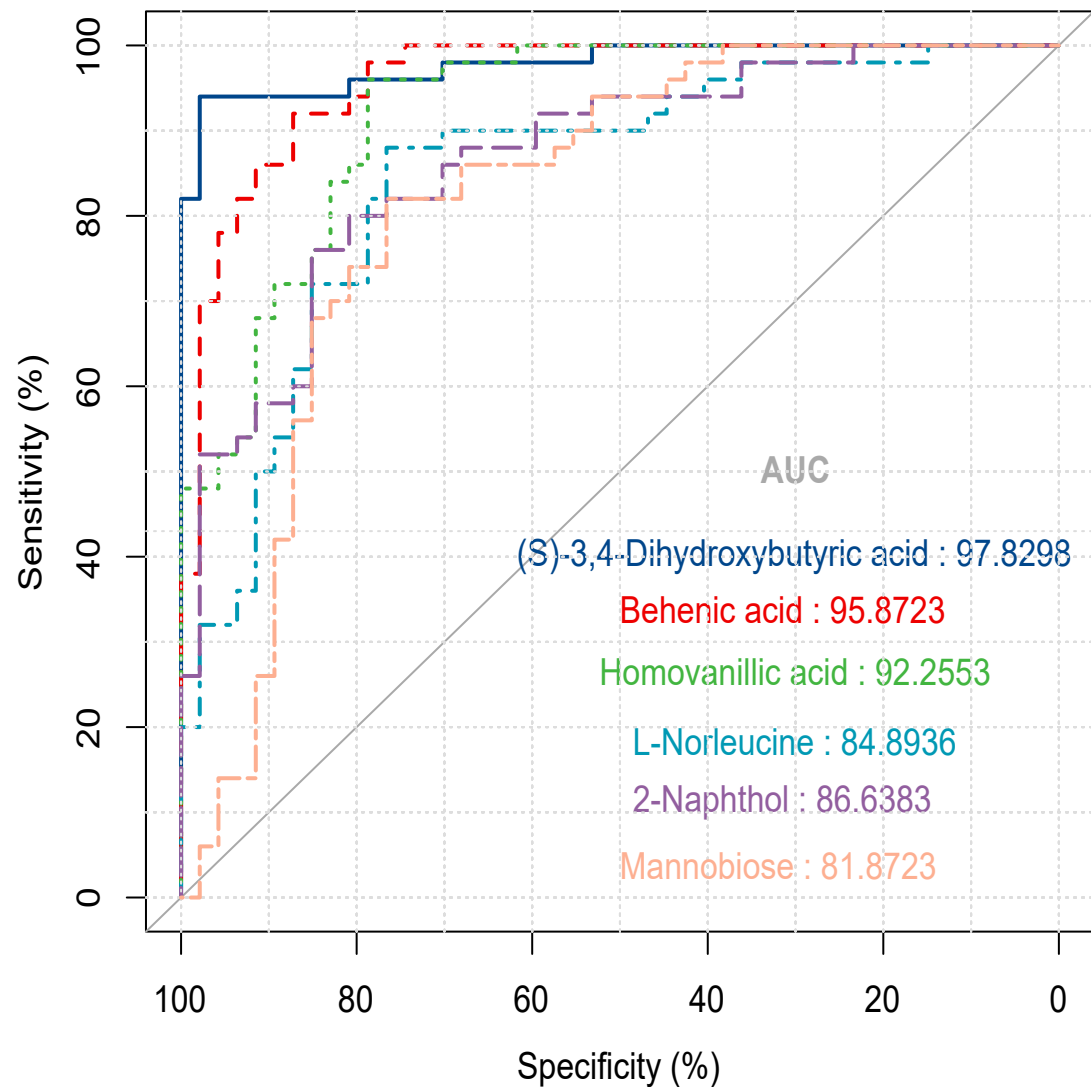

## Male

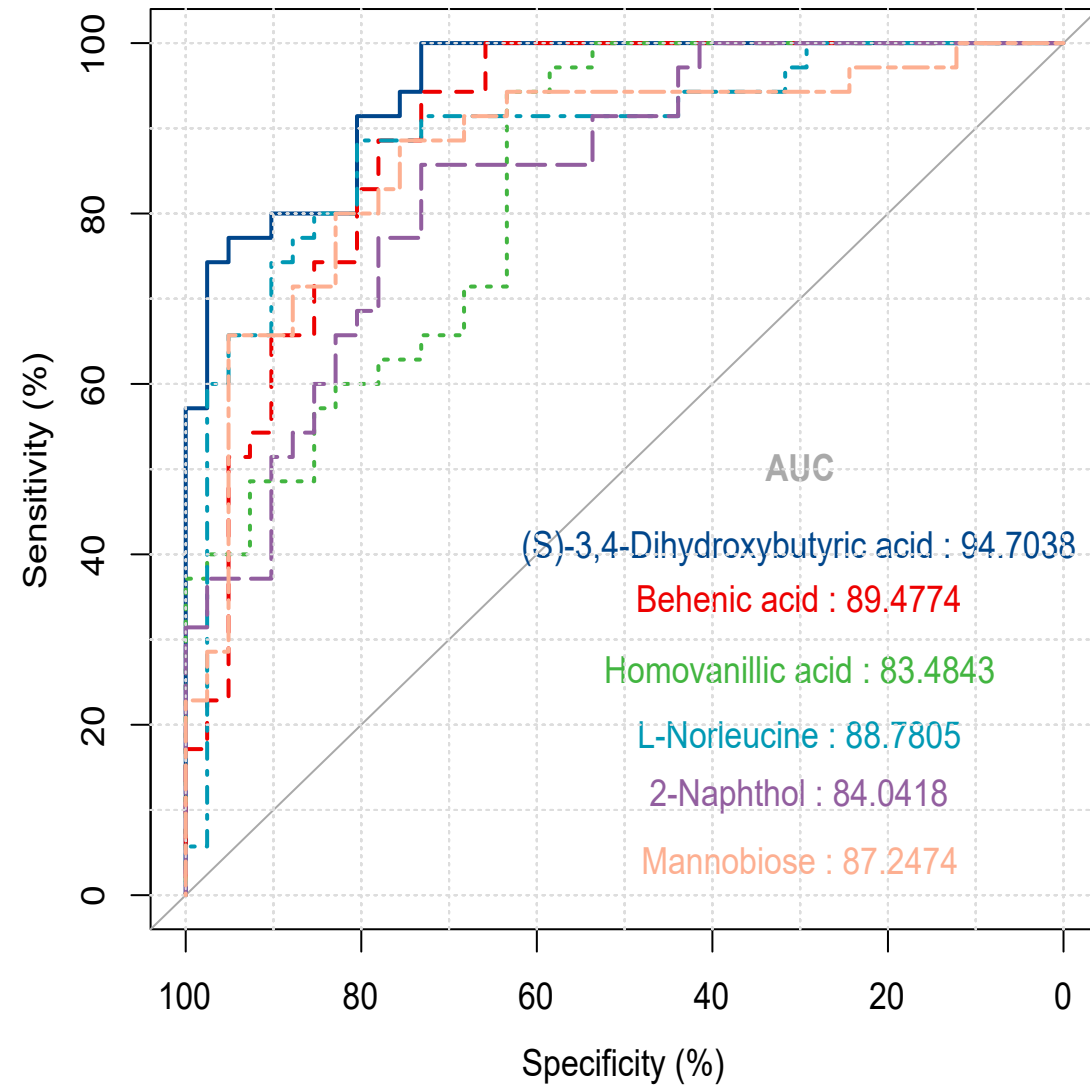

Supplementary Figure S1. The ROC curves of the six potential biomarkers in the female and male samples.
