# Supplementary material for: Alteration of Metabolic Profiles during the Progression of Alzheimer’s Disease
Source: MDPI journal article supplement (doi:10.3390/brainsci13101459), 2023-10-13
Supplement: s1 [file s1]

**Supplementary Table S1. The differentially expressed metabolites between control and AD patients.**

| Metabolites                   | Class                                     | T-statistic | p.value   | FDR      |
|-------------------------------|-------------------------------------------|-------------|-----------|----------|
| L-Norleucine                  | Amino acids                               | -10.017     | 7.10E-19  | 2.68E-17 |
| L-Threonine                   | Amino acids                               | -8.2539     | 3.98E-14  | 6.42E-13 |
| L-Serine                      | Amino acids                               | -7.8635     | 4.02E-13  | 4.13E-12 |
| L-Valine                      | Amino acids                               | -7.0968     | 3.25E-11  | 2.30E-10 |
| Pyroglutamic acid             | Amino acids                               | -5.4507     | 1.73E-07  | 9.77E-07 |
| L-Alanine                     | Amino acids                               | -5.2622     | 4.22E-07  | 1.83E-06 |
| Butyric acid                  | Amino acids                               | -4.7089     | 5.13E-06  | 1.93E-05 |
| L-Proline                     | Amino acids                               | -4.3103     | 2.75E-05  | 9.70E-05 |
| L-alpha-Aminobutyric acid     | Amino acids                               | -4.164      | 4.95E-05  | 0.000165 |
| L-Cystine                     | Amino acids                               | -4.0379     | 8.13E-05  | 0.000255 |
| L-Pipecolic acid              | Amino acids                               | -3.8174     | 0.0001883 | 0.000507 |
| L-Tyrosine                    | Amino acids                               | -3.3968     | 0.0008478 | 0.002083 |
| D-Cysteine                    | Amino acids                               | -3.3265     | 0.0010764 | 0.002534 |
| Glycine                       | Amino acids                               | -3.1231     | 0.0021024 | 0.004658 |
| L-Glutamine                   | Amino acids                               | -3.0969     | 0.0022864 | 0.004969 |
| L-Asparagine                  | Amino acids                               | -2.8888     | 0.0043681 | 0.008814 |
| L-Phenylalanine               | Amino acids                               | -2.805      | 0.0056147 | 0.010939 |
| Creatinine                    | Amino acids                               | -2.5461     | 0.011777  | 0.021816 |
| 4-Deoxyerythronic acid        | Carbohydrates and carbohydrate conjugates | -8.3269     | 2.57E-14  | 4.84E-13 |
| Threonic acid                 | Carbohydrates and carbohydrate conjugates | -8.1195     | 8.87E-14  | 1.25E-12 |
| Mannobiose                    | Carbohydrates and carbohydrate conjugates | 8.0209      | 1.59E-13  | 2.00E-12 |
| Sorbitol                      | Carbohydrates and carbohydrate conjugates | -4.9892     | 1.48E-06  | 5.77E-06 |
| D-Glucose                     | Carbohydrates and carbohydrate conjugates | 3.8375      | 0.0001747 | 0.000481 |
| D-Galactose                   | Carbohydrates and carbohydrate conjugates | 3.6038      | 0.000411  | 0.00108  |
| Hebevinoside I                | Carbohydrates and carbohydrate conjugates | 3.4352      | 0.0007431 | 0.001866 |
| Sucrose                       | Carbohydrates and carbohydrate conjugates | 3.2546      | 0.0013689 | 0.003094 |
| D-Arabitol                    | Carbohydrates and carbohydrate conjugates | -3.0737     | 0.0024615 | 0.005161 |
| Glycerol                      | Carbohydrates and carbohydrate conjugates | -2.9439     | 0.0036919 | 0.007585 |
| 4-Deoxythreonic acid          | Carbohydrates and carbohydrate conjugates | -2.6315     | 0.009277  | 0.017768 |
| Erythritol                    | Carbohydrates and carbohydrate conjugates | -3.9586     | 0.0001104 | 0.000328 |
| Palmitoleic acid              | Lipids and lipid-like molecules           | 2.2968      | 0.022841  | 0.040968 |
| Behenic acid                  | Lipids and lipid-like molecules           | 10.402      | 6.06E-20  | 3.42E-18 |
| MG(16:0/0:0/0:0)              | Lipids and lipid-like molecules           | -6.4015     | 1.43E-09  | 9.50E-09 |
| MG(0:0/18:0/0:0)              | Lipids and lipid-like molecules           | -3.9874     | 9.88E-05  | 0.000302 |
| MG(18:0/0:0/0:0)              | Lipids and lipid-like molecules           | 3.8413      | 0.0001722 | 0.000481 |
| MG(0:0/16:0/0:0)              | Lipids and lipid-like molecules           | 3.0731      | 0.0024661 | 0.005161 |
| Methyl stearate               | Lipids and lipid-like molecules           | 5.0173      | 1.30E-06  | 5.27E-06 |
| (S)-3,4-Dihydroxybutyric acid | Organic compounds                         | -17.454     | 7.82E-40  | 8.84E-38 |
| 2-Naphthol                    | Organic compounds                         | 8.4929      | 9.44E-15  | 2.13E-13 |
| L-Isoleucine                  | Organic compounds                         | -7.9127     | 3.01E-13  | 3.41E-12 |
| Homovanillic acid             | Organic compounds                         | 7.4052      | 5.71E-12  | 4.96E-11 |

|                            |                         |         |           |          |
|----------------------------|-------------------------|---------|-----------|----------|
| Taurine                    | Organic compounds       | -7.157  | 2.32E-11  | 1.75E-10 |
| Urea                       | Organic compounds       | -5.8347 | 2.64E-08  | 1.66E-07 |
| Methoxamine                | Organic compounds       | 5.625   | 7.44E-08  | 4.42E-07 |
| Trimethoprim               | Organic compounds       | 5.3676  | 2.57E-07  | 1.38E-06 |
| Hexaethylene glycol        | Organic compounds       | -5.3437 | 2.88E-07  | 1.48E-06 |
| Octaethylene glycol        | Organic compounds       | -5.3127 | 3.33E-07  | 1.64E-06 |
| 3-Methyl-2-oxovaleric acid | Organic compounds       | -5.3037 | 3.47E-07  | 1.64E-06 |
| L-Kynurenine               | Organic compounds       | 5.1786  | 6.23E-07  | 2.61E-06 |
| Citric acid                | Organic compounds       | 4.5703  | 9.30E-06  | 3.39E-05 |
| Mesylate                   | Organic compounds       | -4.276  | 3.16E-05  | 0.000108 |
| L-Tryptophan               | Organic compounds       | -3.9433 | 0.0001171 | 0.000339 |
| Glycolic acid              | Organic compounds       | 3.4723  | 0.0006536 | 0.001679 |
| Heptaethylene glycol       | Organic compounds       | -2.8134 | 0.0054767 | 0.010857 |
| Heneicosane                | Organic compounds       | -2.6136 | 0.0097573 | 0.018376 |
| 1,2,3-Trihydroxybenzene    | Organic compounds       | -2.3895 | 0.017959  | 0.032732 |
| Erythrono-1,4-lactone      | Organic compounds       | -5.2872 | 3.75E-07  | 1.70E-06 |
| Oxalic acid                | Organic compounds       | -4.0509 | 7.73E-05  | 0.000249 |
| Hypoxanthine               | Organic compounds       | -3.2862 | 0.0012321 | 0.002842 |
| Valeric acid               | Sulfated fatty acids    | -7.1672 | 2.20E-11  | 1.75E-10 |
| Arachidonic acid           | Unsaturated fatty acids | 8.8609  | 1.00E-15  | 2.82E-14 |
| Erucic acid                | Unsaturated fatty acids | 3.3891  | 0.0008704 | 0.002093 |

### Figure legends

Supplementary figure S1. The ROC curves of the six potential biomarkers in the female and male samples.
